# Supplementary material for: Solving Cold‐Standby Reliability‐Redundancy Allocation Problems with Particle‐Based Simplified Swarm Optimization
Source: Hindawi journal article supplement (doi:10.1155/2021/7833641), 2021-01-01
Supplement: f1 [file 7833641.f1.docx]

Data used in systems 1 and 3

| Subsystem *i* |  |  |  |  | *V* | *C* | *W* |
| --- | --- | --- | --- | --- | --- | --- | --- |
| 1  2  3  4  5 | 2.330  1.450  0.541  8.050  1.950 | 1.5  1.5  1.5  1.5  1.5 | 1  2  3  4  2 | 7  8  8  6  9 | 110 | 175 | 200 |

Data used in system 2

| Subsystem *i* |  |  |  |  | *V* | *C* | *W* |
| --- | --- | --- | --- | --- | --- | --- | --- |
| 1  2  3  4  5 | 2.500  1.450  0.541  0.541  2.100 | 1.5  1.5  1.5  1.5  1.5 | 2  4  5  8  4 | 3.5  4.0  4.0  3.5  4.5 | 180 | 175 | 100 |

Data used in system 4

| Subsystem *i* |  |  |  |  | *V* | *C* | *W* |
| --- | --- | --- | --- | --- | --- | --- | --- |
| 1  2  3  4 | 1  2.3  0.3  2.3 | 1.5  1.5  1.5  1.5 | 1  2  3  2 | 6  6  8  7 | 250.0 | 400.0 | 500.0 |
